# Supplementary material for: Whole-Exome Sequencing Identifies Genetic Variants for Severe Adolescent Idiopathic Scoliosis in a Taiwanese Population
Source: MDPI journal article supplement (doi:10.3390/jpm13010032), 2022-12-23
Supplement: s1 [file s1]

**Supplementary Table S1. AIS-related genes**

| No | Gene Name          | Location                              | Exons | Description                                                                        | Reference |
|----|--------------------|---------------------------------------|-------|------------------------------------------------------------------------------------|-----------|
| 1  | AANAT              | <u>17q25.1</u>                        | 8     | Aralkylamine N-acetyltransferase                                                   | [1]       |
| 2  | ABO                | <u>9q34.2</u>                         | 7     | Alpha 1-3-N-Acetylgalactosaminyltransferase And<br>Alpha 1-3-Galactosyltransferase | [2]       |
| 3  | AGMO               | <u>7p21.2</u>                         | 21    | Mesenchyme homeobox 2                                                              | [3]       |
| 4  | BCKDHB             | <u>6q14.1</u>                         | 21    | Branched chain keto acid dehydrogenase E1 subunit<br>beta                          | [3]       |
| 5  | AJAP1              | <u>1p36.32</u>                        | 8     | Adherens junctions associated protein 1                                            | [4]       |
| 6  | AKAP2              | <u>9q31.2-q34.2</u>                   | 5     | A-kinase anchoring protein 2                                                       | [5]       |
| 7  | ARF1               | <u>1q42.13</u>                        | 6     | ADP ribosylation factor 1                                                          | [3]       |
| 8  | FAM46A<br>(TENT5A) | <u>6q14.1</u>                         | 3     | Terminal nucleotidyltransferase 5A                                                 | [3]       |
| 9  | BCL2               | <u>18q21.33</u>                       | 6     | BCL2 apoptosis regulator                                                           | [4]       |
| 10 | BNC2               | <u>9p22.3-p22.2</u>                   | 9     | Basonuclin 2                                                                       | [6]       |
| 11 | CALM2              | <u>2p21</u>                           | 8     | Calmodulin 2                                                                       | [7]       |
| 12 | CHD7               | <u>8q12.2</u>                         | 42    | Chromodomain helicase DNA binding protein 7                                        | [8]       |
| 13 | CHD13              | <u>16q23.3</u>                        | 20    | Cadherin 13                                                                        | [2]       |
| 14 | CHL1               | <u>3p26.3</u>                         | 33    | Cell adhesion molecule L1 like                                                     | [9]       |
| 15 | CREB5              | <u>7p15.1</u>                         | 19    | cAMP responsive element binding protein 5                                          | [3]       |
| 16 | CSMD1              | <u>8p23.2</u>                         | 73    | CUB and Sushi multiple domains 1                                                   | [3]       |
| 17 | DPP9               | <u>19p13.3</u>                        | 32    | Dipeptidyl peptidase 9                                                             | [10]      |
| 18 | EPHA4              | <u>2q36.1</u>                         | 19    | EPH receptor A4                                                                    | [4]       |
| 19 | ESR1               | <u>6q25.1-q25.2</u>                   | 23    | Estrogen receptor 1                                                                | [7, 11]   |
| 20 | FBN1               | <u>15q21.1</u>                        | 66    | Fibrillin 1                                                                        | [12, 13]  |
| 21 | FBN2               | <u>5q23.3</u>                         | 65    | Fibrillin 2                                                                        | [12]      |
| 22 | FTO                | <u>16q12.2</u>                        | 16    | FTO alpha-ketoglutarate dependent dioxygenase                                      | [3]       |
| 23 | GPR126<br>(ADGRG6) | <u>6q24.2</u>                         | 28    | Adhesion G protein-coupled receptor G6                                             | [14]      |
| 24 | IGF1               | <u>12q23.2</u>                        | 7     | Insulin like growth factor 1                                                       | [15]      |
| 25 | IL17RC             | <u>3p25.3;</u><br><u>3p25.3-p24.1</u> | 19    | Interleukin 17 receptor C                                                          | [16, 17]  |
| 26 | IL6                | <u>7p15.3</u>                         | 6     | Interleukin 6                                                                      | [18]      |
| 27 | KIF24              | <u>9p13.3</u>                         | 17    | Kinesin family member 24                                                           | [3]       |
| 28 | LBX1               | <u>10q24.32</u>                       | 2     | Ladybird homeobox 1                                                                | [19, 20]  |
| 29 | LEPR               | <u>1p31.3</u>                         | 24    | Leptin receptor                                                                    | [21]      |
| 30 | MAGI1              | <u>3p14.1</u>                         | 25    | Membrane associated guanylate kinase, WW and PDZ<br>domain containing 1            | [22]      |
| 31 | MAPK7              | <u>17p11.2</u>                        | 9     | Mitogen-activated protein kinase 7                                                 | [23, 24]  |
| 32 | MATN1              | <u>1p35.2</u>                         | 8     | Matrilin 1                                                                         | [25, 26]  |
| 33 | MEIS1              | <u>2p14</u>                           | 13    | Meis homeobox 1                                                                    | [22]      |
| 34 | MEOX2              | <u>7p21.2</u>                         | 3     | Alkylglycerol monooxygenase                                                        | [3]       |
| 35 | MMP3               | <u>11q22.2</u>                        | 10    | Matrix metalloproteinase 3                                                         | [27]      |
| 36 | MTMR11             | <u>1q21.2</u>                         | 17    | Myotubularin related protein 11                                                    | [3]       |
| 37 | MTNR1B             | <u>11q14.3</u>                        | 4     | Melatonin receptor 1B                                                              | [28]      |
| 38 | NT5DC1             | <u>6q22.1</u>                         | 13    | 5'-nucleotidase domain containing 1                                                | [3]       |
| 39 | NUCKS1             | <u>1q32.1</u>                         | 7     | Nuclear casein kinase and cyclin dependent kinase<br>substrate 1                   | [29]      |
| 40 | PAX1               | <u>20p11.22</u>                       | 5     | Paired box 1                                                                       | [30, 31]  |
| 41 | PAX3               | <u>2q36.1</u>                         | 10    | Paired box 3                                                                       | [4, 32]   |
| 42 | PLXNA2             | <u>1q32.2</u>                         | 34    | Plexin A2                                                                          | [3]       |
| 43 | POC5               | <u>5q13.3</u>                         | 16    | POC5 centriolar protein                                                            | [33, 34]  |
| 44 | RUNX2              | <u>6p21.1</u>                         | 10    | RUNX family transcription factor 2                                                 | [35]      |
| 45 | SH3GL1             | <u>19p13.3</u>                        | 12    | SH3 domain containing GRB2 like 1, endophilin A2                                   | [36, 37]  |
| 46 | SLC39A8            | <u>4q24</u>                           | 16    | Solute carrier family 39 member 8                                                  | [38]      |
| 47 | SOCS3              | <u>17q25.3</u>                        | 4     | Suppressor of cytokine signaling 3                                                 | [39]      |
| 48 | SOX6               | <u>11p15.2</u>                        | 22    | SRY-box transcription factor 6                                                     | [2]       |
| 49 | TBX1               | <u>22q11.21</u>                       | 13    | T-box transcription factor 1                                                       | [3]       |
| 50 | TGFB1              | <u>19q13.2</u>                        | 7     | Transforming growth factor beta 1                                                  | [40]      |
| 51 | TIMP2              | <u>17q25.3</u>                        | 5     | TIMP metalloproteinase inhibitor 2                                                 | [41, 42]  |
| 52 | TNIK               | <u>3q26.2-q26.31</u>                  | 34    | TRAF2 and NCK interacting kinase                                                   | [22]      |
| 53 | TPH1               | <u>11p15.1</u>                        | 11    | Tryptophan hydroxylase 1                                                           | [1]       |
| 54 | UNCX               | <u>7p22.3</u>                         | 3     | UNC homeobox                                                                       | [3]       |
| 55 | VDBP (GC)          | <u>4q13.3</u>                         | 15    | GC vitamin D binding protein                                                       | [43]      |
| 56 | VDR                | <u>12q13.11</u>                       | 12    | Vitamin D receptor                                                                 | [43-45]   |

Supplementary Table S2. AIS pathogenic rare variants predicted by ClinVar

| Chr | Position  | Ref. | Alt. | Gene    | Type     | Pathogenicity                                |       |       |
|-----|-----------|------|------|---------|----------|----------------------------------------------|-------|-------|
|     |           |      |      |         |          | ClinVar                                      | CADD  | REVEL |
| 1   | 2406500   | G    | A    | PEX10   | missense | Conflicting interpretations of pathogenicity | 24.5  | 0.115 |
| 1   | 6472613   | G    | A    | PLEKHG5 | missense | Conflicting interpretations of pathogenicity | 29.9  | 0.365 |
| 1   | 43427569  | G    | A    | SZT2    | missense | Conflicting interpretations of pathogenicity | 20.2  | 0.049 |
| 1   | 77926863  | C    | T    | NEXN    | missense | Conflicting interpretations of pathogenicity | 32    | 0.211 |
| 1   | 102879759 | C    | T    | COL11A1 | missense | Conflicting interpretations of pathogenicity | 24.5  | 0.446 |
| 1   | 156175609 | G    | A    | SEMA4A  | missense | Conflicting interpretations of pathogenicity | 4.397 | 0.015 |
| 1   | 226882007 | G    | A    | PSEN2   | missense | Conflicting interpretations of pathogenicity | 18.56 | 0.331 |
| 2   | 26479605  | C    | T    | OTOF    | missense | Conflicting interpretations of pathogenicity | 13.61 | 0.203 |
| 2   | 27498276  | G    | A    | GCKR    | missense | Conflicting interpretations of pathogenicity | 23    | 0.689 |
| 2   | 113062235 | C    | T    | IL36RN  | missense | Conflicting interpretations of pathogenicity | 26.3  | 0.582 |
| 2   | 151562702 | A    | G    | NEB     | missense | Conflicting interpretations of pathogenicity | 31    | 0.491 |
| 2   | 165323388 | T    | C    | SCN2A   | missense | Conflicting interpretations of pathogenicity | 16.31 | 0.434 |
| 2   | 165880687 | G    | A    | TTC21B  | missense | Conflicting interpretations of pathogenicity | 26.5  | 0.341 |
| 2   | 165932983 | T    | A    | TTC21B  | missense | Conflicting interpretations of pathogenicity | 25.3  | 0.255 |
| 2   | 178533203 | C    | T    | TTN     | missense | Conflicting interpretations of pathogenicity | 13.72 | 0.097 |
| 2   | 178560481 | G    | T    | TTN     | missense | Conflicting interpretations of pathogenicity | 18.23 | 0.669 |
| 2   | 178576090 | C    | T    | TTN     | missense | Conflicting interpretations of pathogenicity | 20.3  | 0.189 |
| 2   | 178605029 | G    | A    | TTN     | missense | Conflicting interpretations of pathogenicity | 23.2  | 0.401 |
| 2   | 178630312 | C    | A    | TTN     | missense | Conflicting interpretations of pathogenicity | 24.3  | 0.172 |
| 2   | 178709772 | C    | T    | TTN     | missense | Conflicting interpretations of pathogenicity | 24.6  | 0.24  |
| 2   | 178774941 | G    | C    | TTN     | missense | Conflicting interpretations of pathogenicity | 15.33 | 0.208 |
| 2   | 178802248 | C    | T    | TTN     | missense | Conflicting interpretations of pathogenicity | 24    | 0.499 |
| 2   | 189051367 | G    | T    | COL5A2  | missense | Conflicting interpretations of pathogenicity | 21.5  | 0.291 |
| 2   | 219055221 | C    | T    | IHH     | missense | Conflicting interpretations of pathogenicity | 15.1  | 0.336 |
| 3   | 49100222  | G    | A    | QARS    | missense | Conflicting interpretations of pathogenicity | 32    | 0.536 |
| 3   | 122262227 | G    | A    | CASR    | missense | Conflicting interpretations of pathogenicity | 12.99 | 0.219 |
| 4   | 1002327   | C    | G    | IDUA    | missense | Conflicting interpretations of pathogenicity | 9.866 | 0.207 |
| 4   | 121861565 | T    | A    | BBS7    | missense | Conflicting interpretations of pathogenicity | 21    | 0.582 |
| 5   | 136055770 | C    | A    | TGFBI   | missense | Likely pathogenic                            | 25.7  | 0.629 |
| 5   | 149981105 | G    | A    | SLC26A2 | missense | Conflicting interpretations of pathogenicity | 24.4  | 0.64  |
| 5   | 156759365 | A    | G    | SGCD    | missense | Conflicting interpretations of pathogenicity | 20.3  | 0.865 |

|    |           |   |   |         |          |                                              |       |       |
|----|-----------|---|---|---------|----------|----------------------------------------------|-------|-------|
| 6  | 7585717   | A | C | DSP     | missense | Conflicting interpretations of pathogenicity | 21.9  | 0.047 |
| 6  | 51747987  | G | C | PKHD1   | missense | Conflicting interpretations of pathogenicity | 24.3  | 0.49  |
| 6  | 52054153  | A | G | PKHD1   | missense | Conflicting interpretations of pathogenicity | 21.7  | 0.476 |
| 6  | 73600377  | C | T | SLC17A5 | missense | Conflicting interpretations of pathogenicity | 17.05 | 0.053 |
| 6  | 129383155 | G | A | LAMA2   | missense | Conflicting interpretations of pathogenicity | 22.1  | 0.086 |
| 6  | 152293733 | C | T | SYNE1   | missense | Conflicting interpretations of pathogenicity | 34    | 0.123 |
| 7  | 5987077   | C | T | PMS2    | missense | Conflicting interpretations of pathogenicity | 10.83 | 0.176 |
| 7  | 117504290 | C | T | CFTR    | missense | Conflicting interpretations of pathogenicity | 27.3  | 0.669 |
| 7  | 143330810 | G | A | CLCN1   | missense | Pathogenic/Likely pathogenic                 | 29.5  | 0.9   |
| 8  | 43147034  | G | A | HGSNAT  | missense | Conflicting interpretations of pathogenicity | 8.446 | 0.078 |
| 8  | 99853647  | G | A | VPS13B  | missense | Conflicting interpretations of pathogenicity | 3.283 | 0.141 |
| 8  | 104428071 | T | C | DPYS    | missense | Pathogenic                                   | 28.1  | 0.946 |
| 8  | 104429590 | C | T | DPYS    | missense | Likely pathogenic                            | 35    | 0.894 |
| 8  | 142879710 | A | G | CYP11B1 | missense | Conflicting interpretations of pathogenicity | 5.624 | 0.146 |
| 8  | 143921312 | C | T | PLEC    | missense | Conflicting interpretations of pathogenicity | 22.1  | 0.109 |
| 9  | 69046398  | G | A | FXN     | missense | Conflicting interpretations of pathogenicity | 2.046 | 0.209 |
| 9  | 97685025  | G | C | XPA     | missense | Conflicting interpretations of pathogenicity | 23.6  | 0.133 |
| 10 | 98433970  | G | A | HPS1    | missense | Conflicting interpretations of pathogenicity | -     | -     |
| 11 | 1753865   | C | T | CTSD    | missense | Conflicting interpretations of pathogenicity | 0.002 | 0.069 |
| 11 | 47346297  | C | T | MYBPC3  | missense | Conflicting interpretations of pathogenicity | 24.9  | 0.757 |
| 11 | 65553238  | G | A | LTBP3   | missense | Conflicting interpretations of pathogenicity | 22.7  | 0.189 |
| 11 | 77189442  | G | C | MYO7A   | missense | Conflicting interpretations of pathogenicity | 28.5  | 0.853 |
| 12 | 21882797  | C | T | ABCC9   | missense | Conflicting interpretations of pathogenicity | 21.4  | 0.371 |
| 12 | 32843271  | G | A | PKP2    | missense | Conflicting interpretations of pathogenicity | 0.035 | 0.02  |
| 12 | 43768124  | A | G | IRAK4   | missense | Conflicting interpretations of pathogenicity | 0.003 | 0.187 |
| 12 | 50248679  | G | T | LIMA1   | missense | association                                  | 23.6  | 0.287 |
| 12 | 120978797 | C | T | HNF1A   | missense | Conflicting interpretations of pathogenicity | 23.7  | 0.634 |
| 13 | 32354955  | T | G | BRCA2   | missense | Conflicting interpretations of pathogenicity | 21.5  | 0.133 |
| 13 | 51970609  | C | T | ATP7B   | missense | Conflicting interpretations of pathogenicity | 0.014 | 0.176 |
| 14 | 67729338  | C | G | RDH12   | missense | Conflicting interpretations of pathogenicity | 32    | 0.667 |
| 15 | 77030525  | G | A | PSTPIP1 | missense | Conflicting interpretations of pathogenicity | 1.016 | 0.036 |
| 15 | 89630403  | G | A | KIF7    | missense | Conflicting interpretations of pathogenicity | 34    | 0.525 |
| 16 | 23535179  | C | T | EARS2   | missense | Conflicting interpretations of pathogenicity | 28.7  | 0.313 |
| 16 | 23552164  | T | C | EARS2   | missense | Conflicting interpretations of pathogenicity | 23.1  | 0.23  |

|    |           |   |   |           |          |                                              |       |       |
|----|-----------|---|---|-----------|----------|----------------------------------------------|-------|-------|
| 16 | 23635273  | C | T | PALB2     | missense | Conflicting interpretations of pathogenicity | 16.53 | 0.058 |
| 16 | 53696210  | C | A | RPGRIP1L  | missense | Conflicting interpretations of pathogenicity | 27.1  | 0.538 |
| 16 | 57650313  | C | T | ADGRG1    | missense | Conflicting interpretations of pathogenicity | 0.003 | 0.097 |
| 16 | 89553940  | C | G | SPG7      | missense | Conflicting interpretations of pathogenicity | 28.6  | 0.559 |
| 17 | 16972035  | C | T | TNFRSF13B | missense | Conflicting interpretations of pathogenicity | 3.659 | 0.401 |
| 17 | 39666063  | G | A | TCAP      | missense | Conflicting interpretations of pathogenicity | 13.42 | 0.517 |
| 17 | 43093525  | A | G | BRCA1     | missense | Conflicting interpretations of pathogenicity | 0.003 | 0.778 |
| 17 | 65536321  | G | A | AXIN2     | missense | Conflicting interpretations of pathogenicity | 33    | 0.581 |
| 17 | 80108767  | G | A | GAA       | missense | Conflicting interpretations of pathogenicity | 1.285 | 0.245 |
| 18 | 46577783  | C | T | LOXHD1    | missense | Conflicting interpretations of pathogenicity | 24.2  | 0.327 |
| 19 | 35034076  | G | A | SCN1B     | missense | Conflicting interpretations of pathogenicity | 18.09 | 0.086 |
| 19 | 36058791  | G | T | WDR62     | missense | Conflicting interpretations of pathogenicity | 29.1  | 0.385 |
| 19 | 40396983  | C | T | PRX       | missense | Conflicting interpretations of pathogenicity | 17.68 | 0.199 |
| 20 | 13816520  | T | G | NDUFAF5   | missense | Conflicting interpretations of pathogenicity | 27.7  | 0.887 |
| 20 | 36905449  | C | T | SAMHD1    | missense | Conflicting interpretations of pathogenicity | 16.25 | 0.259 |
| 21 | 46121586  | C | A | COL6A2    | missense | Conflicting interpretations of pathogenicity | 22    | 0.594 |
| 21 | 46349722  | A | G | PCNT      | missense | Conflicting interpretations of pathogenicity | 0.002 | 0.009 |
| 22 | 31861414  | C | T | DEPDC5    | missense | Conflicting interpretations of pathogenicity | 26.5  | 0.115 |
| X  | 32545231  | G | C | DMD       | missense | Conflicting interpretations of pathogenicity | 15.32 | 0.127 |
| X  | 46837149  | C | T | RP2       | missense | Likely pathogenic                            | 5.732 | 0.243 |
| X  | 69957121  | A | C | EDA       | missense | Conflicting interpretations of pathogenicity | 19.24 | 0.563 |
| X  | 154352801 | T | C | FLNA      | missense | Conflicting interpretations of pathogenicity | 0.075 | 0.274 |

**Supplementary Table S3. AIS pathogenic rare variants predicted by CADD and REVEL**

| Chr | Position  | Ref. | Alt. | Gene    | Type     | Pathogenicity          |      |       |
|-----|-----------|------|------|---------|----------|------------------------|------|-------|
|     |           |      |      |         |          | ClinVar                | CADD | REVEL |
| 1   | 1437479   | T    | C    | VWA1    | missense | -                      | 23.3 | 0.776 |
| 1   | 2303306   | C    | T    | SKI     | missense | Uncertain significance | 34   | 0.764 |
| 1   | 6235844   | A    | G    | ICMT    | missense | -                      | 20.6 | 0.794 |
| 1   | 9262281   | A    | G    | H6PD    | missense | -                      | 24.8 | 0.845 |
| 1   | 26022938  | G    | C    | EXTL1   | missense | -                      | 25.9 | 0.816 |
| 1   | 39292770  | A    | T    | MACF1   | missense | -                      | 27.1 | 0.86  |
| 1   | 48229386  | G    | A    | SLC5A9  | missense | -                      | 34   | 0.952 |
| 1   | 84865873  | T    | C    | LPAR3   | missense | -                      | 23.4 | 0.784 |
| 1   | 119764211 | A    | G    | HMGCS2  | missense | Uncertain significance | 25.1 | 0.858 |
| 1   | 169876078 | T    | C    | SCYL3   | missense | -                      | 24.4 | 0.962 |
| 1   | 203068501 | T    | C    | PPFIA4  | missense | -                      | 26.9 | 0.916 |
| 1   | 222547756 | A    | C    | HHIPL2  | missense | -                      | 24   | 0.94  |
| 2   | 24017298  | C    | G    | MFSD2B  | missense | -                      | 25.2 | 0.791 |
| 2   | 26279238  | C    | T    | HADHB   | missense | -                      | 34   | 0.889 |
| 2   | 26942037  | C    | T    | DPYSL5  | missense | -                      | 31   | 0.766 |
| 2   | 72514652  | T    | C    | EXOC6B  | missense | -                      | 29.6 | 0.83  |
| 2   | 95410531  | T    | G    | FAHD2A  | missense | -                      | 24.1 | 0.854 |
| 2   | 96114883  | G    | A    | ADRA2B  | missense | -                      | 26.4 | 0.866 |
| 2   | 127574021 | A    | C    | MYO7B   | missense | -                      | 26.7 | 0.763 |
| 2   | 127640126 | C    | A    | LIMS2   | missense | -                      | 26.9 | 0.773 |
| 2   | 151650373 | A    | T    | NEB     | missense | -                      | 24.2 | 0.94  |
| 2   | 160137499 | A    | G    | ITGB6   | missense | -                      | 25.8 | 0.852 |
| 2   | 166199135 | C    | T    | SCN9A   | missense | Uncertain significance | 34   | 0.765 |
| 2   | 178738312 | C    | T    | TTN     | missense | Likely benign          | 22.6 | 0.814 |
| 2   | 189051399 | C    | T    | COL5A2  | missense | Benign/Likely benign   | 27   | 0.914 |
| 2   | 231037666 | T    | C    | C2orf72 | missense | -                      | 23.6 | 0.77  |
| 2   | 240509382 | G    | A    | ANKMY1  | missense | -                      | 32   | 0.758 |
| 3   | 9751845   | G    | A    | OGG1    | missense | -                      | 34   | 0.938 |
| 3   | 38556545  | A    | G    | SCN5A   | missense | Uncertain significance | 28.1 | 0.94  |
| 3   | 44786447  | A    | G    | KIF15   | missense | -                      | 26.4 | 0.836 |
| 3   | 44797927  | G    | T    | KIF15   | missense | -                      | 29.3 | 0.865 |
| 3   | 52766345  | C    | A    | NEK4    | missense | -                      | 31   | 0.95  |
| 3   | 89429165  | C    | T    | EPHA3   | missense | -                      | 35   | 0.774 |
| 3   | 126007159 | C    | G    | SLC41A3 | missense | -                      | 29.9 | 0.778 |
| 3   | 132478076 | G    | T    | DNAJC13 | missense | -                      | 21.8 | 0.762 |
| 3   | 184038163 | T    | C    | HTR3D   | missense | -                      | 24.4 | 0.781 |
| 4   | 24800051  | C    | T    | SOD3    | missense | -                      | 32   | 0.769 |
| 4   | 40335902  | G    | A    | NA9     | missense | -                      | 32   | 0.838 |
| 4   | 54736553  | C    | T    | KIT     | missense | Uncertain significance | 31   | 0.889 |
| 4   | 145064603 | C    | A    | ANAPC10 | missense | -                      | 33   | 0.951 |

|    |           |   |   |          |          |                                              |      |       |
|----|-----------|---|---|----------|----------|----------------------------------------------|------|-------|
| 4  | 150849453 | A | C | LRBA     | missense | -                                            | 28.5 | 0.837 |
| 4  | 151291118 | G | T | PRSS48   | missense | -                                            | 27   | 0.851 |
| 4  | 169992054 | G | A | MFAP3L   | missense | -                                            | 24.7 | 0.75  |
| 5  | 60890933  | G | C | ERCC8    | missense | -                                            | 29.6 | 0.949 |
| 5  | 115837653 | A | T | ATG12    | missense | -                                            | 28.1 | 0.842 |
| 5  | 128464741 | C | A | FBN2     | missense | -                                            | 29.8 | 0.824 |
| 5  | 151822699 | G | A | GLRA1    | missense | Uncertain significance                       | 33   | 0.786 |
| 5  | 156759365 | A | G | SGCD     | missense | Conflicting interpretations of pathogenicity | 20.3 | 0.865 |
| 5  | 177397831 | T | G | SLC34A1  | missense | -                                            | 27.6 | 0.882 |
| 6  | 64626235  | C | T | EYS      | missense | Uncertain significance                       | 29.6 | 0.788 |
| 6  | 107459005 | A | G | PDSS2    | missense | -                                            | 33   | 0.791 |
| 6  | 130890408 | G | A | EPB41L2  | missense | -                                            | 35   | 0.984 |
| 6  | 144835791 | A | T | UTRN     | missense | -                                            | 29.2 | 0.837 |
| 7  | 35873733  | G | T | SEPTIN7  | missense | -                                            | 31   | 0.846 |
| 7  | 41978655  | A | T | GLI3     | missense | -                                            | 28.7 | 0.923 |
| 7  | 73831563  | C | T | CLDN4    | missense | -                                            | 28.8 | 0.802 |
| 7  | 92504872  | A | G | PEX1     | missense | -                                            | 24.3 | 0.817 |
| 7  | 94423084  | G | A | COL1A2   | missense | -                                            | 25.2 | 0.967 |
| 7  | 99011095  | C | T | TRRAP    | missense | -                                            | 35   | 0.885 |
| 7  | 143323375 | G | A | CLCN1    | missense | Uncertain significance                       | 32   | 0.843 |
| 7  | 143330810 | G | A | CLCN1    | missense | Pathogenic/Likely pathogenic                 | 29.5 | 0.9   |
| 7  | 143331616 | G | A | CLCN1    | missense | -                                            | 35   | 0.915 |
| 8  | 10538492  | C | A | PRSS55   | missense | -                                            | 27.5 | 0.811 |
| 8  | 11300072  | G | T | MTMR9    | missense | -                                            | 34   | 0.836 |
| 8  | 17373174  | T | C | MTMR7    | missense | -                                            | 26.1 | 0.915 |
| 8  | 22100664  | T | C | FAM160B2 | missense | -                                            | 27.5 | 0.766 |
| 8  | 38234508  | G | A | DDHD2    | missense | Likely benign                                | 34   | 0.75  |
| 8  | 104428071 | T | C | DPYS     | missense | Pathogenic                                   | 28.1 | 0.946 |
| 8  | 104429590 | C | T | DPYS     | missense | Likely pathogenic                            | 35   | 0.894 |
| 8  | 138676616 | C | A | COL22A1  | missense | -                                            | 23.3 | 0.832 |
| 8  | 143839988 | G | T | NRBP2    | missense | -                                            | 26.1 | 0.76  |
| 9  | 39078875  | C | T | CNTNAP3  | missense | -                                            | 25   | 0.763 |
| 9  | 100578538 | T | A | CAVIN4   | missense | -                                            | 34   | 0.883 |
| 9  | 109255578 | G | A | EPB41L4B | missense | -                                            | 34   | 0.761 |
| 10 | 33213531  | C | T | NRP1     | missense | -                                            | 26.2 | 0.75  |
| 10 | 69005904  | T | C | KIF1BP   | missense | -                                            | 28.3 | 0.825 |
| 10 | 69483695  | T | C | TSPAN15  | missense | -                                            | 25.4 | 0.768 |
| 10 | 70142673  | A | T | TYSND1   | missense | -                                            | 24.1 | 0.782 |
| 10 | 99716418  | G | C | COX15    | missense | -                                            | 27.2 | 0.835 |
| 11 | 6240139   | C | A | CNGA4    | missense | -                                            | 23.6 | 0.759 |
| 11 | 6614985   | T | G | TPP1     | missense | -                                            | 27   | 0.929 |
| 11 | 47346297  | C | T | MYBPC3   | missense | Conflicting interpretations of pathogenicity | 24.9 | 0.757 |
| 11 | 68348146  | C | T | LRP5     | missense | -                                            | 31   | 0.869 |

|    |           |   |   |          |          |                                              |      |       |
|----|-----------|---|---|----------|----------|----------------------------------------------|------|-------|
| 11 | 77189442  | G | C | MYO7A    | missense | Conflicting interpretations of pathogenicity | 28.5 | 0.853 |
| 11 | 112194746 | G | A | BCO2     | missense | -                                            | 26.1 | 0.862 |
| 12 | 2611975   | G | A | CACNA1C  | missense | Uncertain significance                       | 25.1 | 0.779 |
| 12 | 21642074  | C | T | LDHB     | missense | -                                            | 24.5 | 0.844 |
| 12 | 49963585  | C | T | AQP5     | missense | -                                            | 33   | 0.762 |
| 12 | 52601034  | A | T | KRT72    | missense | -                                            | 32   | 0.953 |
| 12 | 121854776 | C | T | HPD      | missense | -                                            | 32   | 0.863 |
| 13 | 24284248  | G | A | SPATA13  | missense | -                                            | 33   | 0.764 |
| 13 | 38968452  | A | G | STOML3   | missense | -                                            | 26.8 | 0.927 |
| 13 | 76995986  | G | C | CLN5     | missense | Uncertain significance                       | 25.5 | 0.848 |
| 14 | 90676545  | C | T | TTC7B    | missense | -                                            | 33   | 0.789 |
| 15 | 40411270  | G | C | IVD      | missense | Uncertain significance                       | 27.6 | 0.93  |
| 15 | 45094679  | G | A | DUOX2    | missense | Uncertain significance                       | 35   | 0.845 |
| 15 | 71991147  | G | A | MYO9A    | missense | -                                            | 33   | 0.81  |
| 15 | 89750873  | A | G | MESP1    | missense | -                                            | 25.2 | 0.88  |
| 15 | 98891348  | C | T | IGF1R    | missense | -                                            | 23.6 | 0.763 |
| 16 | 984730    | A | C | SOX8     | missense | -                                            | 24.5 | 0.822 |
| 16 | 4260115   | C | T | TFAP4    | missense | -                                            | 29.3 | 0.76  |
| 16 | 30376199  | C | T | MYLPF    | missense | -                                            | 34   | 0.765 |
| 16 | 48178620  | C | T | ABCC11   | missense | -                                            | 26   | 0.816 |
| 16 | 72798598  | A | G | ZFHX3    | missense | -                                            | 22.8 | 0.796 |
| 16 | 84222725  | G | A | KCNG4    | missense | -                                            | 28.6 | 0.807 |
| 16 | 88810124  | C | T | APRT     | missense | Uncertain significance                       | 26.7 | 0.863 |
| 17 | 1480776   | C | A | MYO1C    | missense | -                                            | 29.4 | 0.925 |
| 17 | 18959147  | C | T | SLC5A10  | missense | -                                            | 32   | 0.866 |
| 17 | 21703480  | C | T | KCNJ18   | missense | -                                            | 25.9 | 0.84  |
| 17 | 29095054  | T | C | MYO18A   | missense | -                                            | 31   | 0.893 |
| 17 | 39107505  | A | G | PLXDC1   | missense | -                                            | 26.6 | 0.876 |
| 17 | 41884269  | G | A | ACLY     | missense | -                                            | 31   | 0.764 |
| 18 | 48950022  | T | C | SMAD7    | missense | -                                            | 23   | 0.805 |
| 18 | 79126315  | C | T | ATP9B    | missense | -                                            | 34   | 0.816 |
| 18 | 79277071  | A | T | ATP9B    | missense | -                                            | 31   | 0.899 |
| 19 | 13235658  | A | G | CACNA1A  | missense | -                                            | 23   | 0.831 |
| 19 | 33512643  | C | T | PEPD     | missense | -                                            | 33   | 0.905 |
| 19 | 40502809  | G | A | SPTBN4   | missense | -                                            | 34   | 0.75  |
| 19 | 48836366  | C | T | HSD17B14 | missense | -                                            | 34   | 0.752 |
| 19 | 50445880  | G | C | MYBPC2   | missense | -                                            | 23.8 | 0.85  |
| 20 | 6085278   | A | G | FERMT1   | missense | -                                            | 31   | 0.94  |
| 20 | 13816520  | T | G | NDUFAF5  | missense | Conflicting interpretations of pathogenicity | 27.7 | 0.887 |
| 20 | 23048217  | C | T | THBD     | missense | -                                            | 29.4 | 0.814 |
| 20 | 25259273  | C | T | PYGB     | missense | -                                            | 35   | 0.936 |
| 20 | 36615277  | G | C | SLA2     | missense | -                                            | 25.5 | 0.792 |
| 20 | 42081933  | G | C | PTPRT    | missense | -                                            | 28.8 | 0.778 |

|    |           |   |   |         |          |               |      |       |
|----|-----------|---|---|---------|----------|---------------|------|-------|
| 20 | 62798639  | C | T | MRGBP   | missense | -             | 33   | 0.794 |
| 21 | 38299527  | C | T | KCNJ15  | missense | -             | 24   | 0.751 |
| 21 | 42121098  | T | C | UMODL1  | missense | -             | 24.1 | 0.871 |
| 21 | 44312232  | T | A | PFKL    | missense | -             | 25.4 | 0.935 |
| 22 | 21968713  | C | T | TOP3B   | missense | -             | 33   | 0.923 |
| 22 | 50576537  | C | A | CPT1B   | missense | -             | 32   | 0.767 |
| 22 | 50625378  | G | C | ARSA    | missense | Likely benign | 22.6 | 0.75  |
| 22 | 50626061  | C | T | ARSA    | missense | Likely benign | 28   | 0.788 |
| X  | 49216406  | A | C | CACNA1F | missense | -             | 23.7 | 0.974 |
| X  | 100599568 | T | C | TNMD    | missense | -             | 26.4 | 0.78  |

---



Supplementary Table S4. Rare variants carried by patient 7

| Chr | Position  | Ref | Alt. | Gene     | Type     | avSNP150    | TWB    | Pathogenicity                                   |                |
|-----|-----------|-----|------|----------|----------|-------------|--------|-------------------------------------------------|----------------|
|     |           |     |      |          |          |             |        | ClinVar                                         | CADD/<br>REVEL |
| 1   | 1437479   | T   | C    | VWA1     | missense | rs753372307 | -      | -                                               | 23.3/0.776     |
| 1   | 169876078 | T   | C    | SCYL3    | missense | -           | -      | -                                               | 24.4/0.962     |
| 2   | 113062235 | C   | T    | IL36RN   | missense | rs139497891 | -      | Conflicting interpretations<br>of pathogenicity | 26.3/0.582     |
| 2   | 178802248 | C   | T    | TTN      | missense | rs758169489 | 0.0015 | Conflicting interpretations<br>of pathogenicity | 24/0.499       |
| 2   | 72514652  | T   | C    | EXOC6B   | missense | -           | -      | -                                               | 29.6/0.83      |
| 2   | 96114883  | G   | A    | ADRA2B   | missense | rs764017593 | 0.0005 | -                                               | 26.4/0.866     |
| 2   | 160137499 | A   | G    | ITGB6    | missense | rs376026402 | -      | -                                               | 25.8/0.852     |
| 2   | 189051399 | C   | T    | COL5A2   | missense | rs772448543 | 0.005  | Benign/Likely benign                            | 27/0.914       |
| 3   | 38556545  | A   | G    | SCN5A    | missense | rs754733108 | -      | Uncertain significance                          | 28.1/0.94      |
| 3   | 132478076 | G   | T    | DNAJC13  | missense | rs761450652 | 0.0015 | -                                               | 21.8/0.762     |
| 4   | 40335902  | G   | A    | CHRNA9   | missense | rs188109471 | 0.001  | -                                               | 32/0.838       |
| 6   | 7585717   | A   | C    | DSP      | missense | rs138329459 | 0.0015 | Conflicting interpretations<br>of pathogenicity | 21.9/0.047     |
| 6   | 144835791 | A   | T    | UTRN     | missense | -           | -      | -                                               | 29.2/0.837     |
| 7   | 117504290 | C   | T    | CFTR     | missense | rs1800073   | 0.007  | Conflicting interpretations<br>of pathogenicity | 27.3/0.669     |
| 7   | 35873733  | G   | T    | SEPTIN7  | missense | -           | -      | -                                               | 31/0.846       |
| 7   | 143323375 | G   | A    | CLCN1    | missense | rs746691295 | -      | Uncertain significance                          | 32/0.843       |
| 8   | 22100664  | T   | C    | FAM160B2 | missense | rs780699373 | -      | -                                               | 27.5/0.766     |
| 9   | 69046398  | G   | A    | FXN      | missense | rs141858334 | 0.004  | Conflicting interpretations<br>of pathogenicity | 2.046/0.209    |
| 10  | 99716418  | G   | C    | COX15    | missense | -           | -      | -                                               | 27.2/0.835     |
| 15  | 89630403  | G   | A    | KIF7     | missense | rs147191956 | -      | Conflicting interpretations<br>of pathogenicity | 34/0.525       |
| 16  | 30376199  | C   | T    | MYLPF    | missense | rs368612339 | -      | -                                               | 34/0.765       |
| 16  | 88810124  | C   | T    | APRT     | missense | rs201944035 | 0.003  | Uncertain significance                          | 26.7/0.863     |
| 17  | 39666063  | G   | A    | TCAP     | missense | rs149585781 | -      | Conflicting interpretations<br>of pathogenicity | 13.42/0.517    |
| 21  | 46349722  | A   | G    | PCNT     | missense | rs368199588 | 0.001  | Conflicting interpretations<br>of pathogenicity | 0.002/0.009    |
| X   | 46837149  | C   | T    | RP2      | missense | rs782103396 | -      | Likely pathogenic                               | 5.732/0.243    |

**Supplementary Table S5. AIS candidate genes**

| Human Associated<br>Gene Name<br>(N=206) | Mouse Associated<br>Gene Name<br>(N=200) | Ensembl gene ID<br>(N=200) | Note                               |
|------------------------------------------|------------------------------------------|----------------------------|------------------------------------|
| ABCC11                                   | -                                        | -                          | Can't mapped to mouse gene name    |
| ABCC9                                    | Abcc9                                    | ENSMUSG00000030249         | -                                  |
| ACLY                                     | Acly                                     | ENSMUSG00000020917         | -                                  |
| ADGRG1                                   | Adgrg1                                   | ENSMUSG00000031785         | -                                  |
| ADRA2B                                   | Adra2b                                   | ENSMUSG00000058620         | -                                  |
| ANAPC10                                  | Anapc10                                  | ENSMUSG00000036977         | -                                  |
| ANKMY1                                   | Ankmy1                                   | ENSMUSG00000034212         | -                                  |
| APRT                                     | Aprt                                     | ENSMUSG00000006589         | -                                  |
| AQP5                                     | Aqp5                                     | ENSMUSG00000044217         | -                                  |
| ARF1                                     | Arf1                                     | ENSMUSG00000048076         | -                                  |
| ARSA                                     | Arsa                                     | ENSMUSG00000022620         | -                                  |
| ATG12                                    | Atg12                                    | ENSMUSG00000032905         | -                                  |
| ATP7B                                    | Atp7b                                    | ENSMUSG00000006567         | -                                  |
| ATP9B                                    | Atp9b                                    | ENSMUSG00000024566         | -                                  |
| AXIN2                                    | Axin2                                    | ENSMUSG00000000142         | -                                  |
| BBS7                                     | Bbs7                                     | ENSMUSG00000037325         | -                                  |
| BCO2                                     | Bco2                                     | ENSMUSG00000032066         | -                                  |
| BRCA1                                    | Brca1                                    | ENSMUSG00000017146         | -                                  |
| BRCA2                                    | Brca2                                    | ENSMUSG00000041147         | -                                  |
| C2orf72                                  | 2810459M11Rik                            | ENSMUSG00000026227         | -                                  |
| CACNA1A                                  | Cacna1a                                  | ENSMUSG00000034656         | -                                  |
| CACNA1C                                  | Cacna1c                                  | ENSMUSG00000051331         | -                                  |
| CACNA1F                                  | Cacna1f                                  | ENSMUSG00000031142         | -                                  |
| CASR                                     | Casr                                     | ENSMUSG00000051980         | -                                  |
| CAVIN4                                   | Cavin4                                   | ENSMUSG00000028348         | -                                  |
| CFTR                                     | Cfr                                      | ENSMUSG00000041301         | -                                  |
| CHRNA9                                   | Chrna9                                   | ENSMUSG00000029205         | -                                  |
| CLCN1                                    | Cln1                                     | ENSMUSG00000029862         | -                                  |
| CLDN4                                    | Cldn13                                   | ENSMUSG00000008843         | Mapped to multiple mouse gene name |
| CLDN4                                    | Cldn4                                    | ENSMUSG00000047501         | Mapped to multiple mouse gene name |
| CLN5                                     | Cln5                                     | ENSMUSG00000022125         | -                                  |
| CNGA4                                    | Cnga4                                    | ENSMUSG00000030897         | -                                  |
| CNTNAP3                                  | Cntnap3                                  | ENSMUSG00000033063         | -                                  |
| COL11A1                                  | Col11a1                                  | ENSMUSG00000027966         | -                                  |
| COL1A2                                   | Col1a2                                   | ENSMUSG00000029661         | -                                  |
| COL22A1                                  | -                                        | -                          | Can't mapped to mouse gene name    |
| COL5A2                                   | Col5a2                                   | ENSMUSG00000026042         | -                                  |
| COL6A2                                   | Col6a2                                   | ENSMUSG00000020241         | -                                  |
| COX15                                    | Cox15                                    | ENSMUSG00000040018         | -                                  |
| CPT1B                                    | Cpt1b                                    | ENSMUSG00000078937         | -                                  |
| CSMD1                                    | Csmd1                                    | ENSMUSG00000060924         | -                                  |
| CTSD                                     | Gm49369                                  | ENSMUSG00000110040         | Mapped to multiple mouse gene name |
| CTSD                                     | Ctsd                                     | ENSMUSG00000007891         | Mapped to multiple mouse gene name |
| CYP11B1                                  | -                                        | -                          | Can't mapped to mouse gene name    |
| DDHD2                                    | Ddhd2                                    | ENSMUSG00000061313         | -                                  |
| DEPDC5                                   | Depdc5                                   | ENSMUSG00000037426         | -                                  |
| DMD                                      | Dmd                                      | ENSMUSG00000045103         | -                                  |
| DNAJC13                                  | Dnajc13                                  | ENSMUSG00000032560         | -                                  |
| DPYS                                     | Dpys                                     | ENSMUSG00000022304         | -                                  |

|          |          |                    |                                 |
|----------|----------|--------------------|---------------------------------|
| DPYSL5   | Dpysl5   | ENSMUSG00000029168 | -                               |
| DSP      | Dsp      | ENSMUSG00000054889 | -                               |
| DUOX2    | Duox2    | ENSMUSG00000068452 | -                               |
| EARS2    | Ears2    | ENSMUSG00000030871 | -                               |
| EDA      | Eda      | ENSMUSG00000059327 | -                               |
| EPB41L2  | Epb41l2  | ENSMUSG00000019978 | -                               |
| EPB41L4B | Epb41l4b | ENSMUSG00000028434 | -                               |
| EPHA3    | Epha3    | ENSMUSG00000052504 | -                               |
| ERCC8    | Ercc8    | ENSMUSG00000021694 | -                               |
| EXOC6B   | Exoc6b   | ENSMUSG00000033769 | -                               |
| EXTL1    | Extl1    | ENSMUSG00000028838 | -                               |
| EYS      | -        | -                  | Can't mapped to mouse gene name |
| FAHD2A   | Fahd2a   | ENSMUSG00000027371 | -                               |
| FAM160B2 | -        | -                  | Can't mapped to mouse gene name |
| FBN2     | Fbn2     | ENSMUSG00000024598 | -                               |
| FERMT1   | Fermt1   | ENSMUSG00000027356 | -                               |
| FLNA     | Flna     | ENSMUSG00000031328 | -                               |
| FXN      | Fxn      | ENSMUSG00000059363 | -                               |
| GAA      | Gaa      | ENSMUSG00000025579 | -                               |
| GC       | Gc       | ENSMUSG00000035540 | -                               |
| GCKR     | Gckr     | ENSMUSG00000059434 | -                               |
| GLI3     | Gli3     | ENSMUSG00000021318 | -                               |
| GLRA1    | Glra1    | ENSMUSG00000000263 | -                               |
| H6PD     | H6pd     | ENSMUSG00000028980 | -                               |
| HADHB    | Hadhb    | ENSMUSG00000059447 | -                               |
| HGSNAT   | Hgsnat   | ENSMUSG00000037260 | -                               |
| HHIPL2   | Hhipl2   | ENSMUSG00000053461 | -                               |
| HMGCS2   | Hmgcs2   | ENSMUSG00000027875 | -                               |
| HNFI1A   | Hnfla    | ENSMUSG00000029556 | -                               |
| HPD      | Hpd      | ENSMUSG00000029445 | -                               |
| HPS1     | Hps1     | ENSMUSG00000025188 | -                               |
| HSD17B14 | Hsd17b14 | ENSMUSG00000030825 | -                               |
| HTR3D    | -        | -                  | Can't mapped to mouse gene name |
| ICMT     | Icmt     | ENSMUSG00000039662 | -                               |
| IDUA     | Idua     | ENSMUSG00000033540 | -                               |
| IGF1R    | Igflr    | ENSMUSG00000005533 | -                               |
| IHH      | Ihh      | ENSMUSG00000006538 | -                               |
| IL36RN   | Il36rn   | ENSMUSG00000026983 | -                               |
| IL6      | Il6      | ENSMUSG00000025746 | -                               |
| IRAK4    | Irak4    | ENSMUSG00000059883 | -                               |
| ITGB6    | Itgb6    | ENSMUSG00000026971 | -                               |
| IVD      | Ivd      | ENSMUSG00000027332 | -                               |
| KCNG4    | Kcng4    | ENSMUSG00000045246 | -                               |
| KCNJ15   | Kcnj15   | ENSMUSG00000062609 | -                               |
| KCNJ18   | Kcnj12   | ENSMUSG00000042529 | -                               |
| KIF15    | Kif15    | ENSMUSG00000036768 | -                               |
| KIF1BP   | -        | -                  | Can't mapped to mouse gene name |
| KIF7     | Kif7     | ENSMUSG00000050382 | -                               |
| KIT      | Kit      | ENSMUSG00000005672 | -                               |
| KRT72    | Krt72    | ENSMUSG00000056605 | -                               |
| LAMA2    | Lama2    | ENSMUSG00000019899 | -                               |
| LDHB     | Ldhb     | ENSMUSG00000030246 | -                               |
| LIMA1    | Lima1    | ENSMUSG00000023022 | -                               |

|         |         |                    |   |
|---------|---------|--------------------|---|
| LIMS2   | Lims2   | ENSMUSG00000024395 | - |
| LOXHD1  | Loxhd1  | ENSMUSG00000032818 | - |
| LPAR3   | Lpar3   | ENSMUSG00000036832 | - |
| LRBA    | Lrba    | ENSMUSG00000028080 | - |
| LRP5    | Lrp5    | ENSMUSG00000024913 | - |
| LTBP3   | Ltbp3   | ENSMUSG00000024940 | - |
| MACF1   | Macf1   | ENSMUSG00000028649 | - |
| MAGI1   | Magi1   | ENSMUSG00000045095 | - |
| MESP1   | Mesp1   | ENSMUSG00000030544 | - |
| MFAP3L  | Mfap3l  | ENSMUSG00000031647 | - |
| MFSD2B  | Mfsd2b  | ENSMUSG00000037336 | - |
| MRGBP   | Mrgbp   | ENSMUSG00000027569 | - |
| MTMR7   | Mtmr7   | ENSMUSG00000039431 | - |
| MTMR9   | Mtmr9   | ENSMUSG00000035078 | - |
| MYBPC2  | Mybpc2  | ENSMUSG00000038670 | - |
| MYBPC3  | Mybpc3  | ENSMUSG00000002100 | - |
| MYLPF   | Mylpf   | ENSMUSG00000030672 | - |
| MYO18A  | Myo18a  | ENSMUSG00000000631 | - |
| MYO1C   | Myo1c   | ENSMUSG00000017774 | - |
| MYO7A   | Myo7a   | ENSMUSG00000030761 | - |
| MYO7B   | Myo7b   | ENSMUSG00000024388 | - |
| MYO9A   | Myo9a   | ENSMUSG00000039585 | - |
| NDUFAF5 | Ndufaf5 | ENSMUSG00000027384 | - |
| NEB     | Neb     | ENSMUSG00000026950 | - |
| NEK4    | Nek4    | ENSMUSG00000021918 | - |
| NEXN    | Nexn    | ENSMUSG00000039103 | - |
| NRBP2   | Nrbp2   | ENSMUSG00000075590 | - |
| NRP1    | Nrp1    | ENSMUSG00000025810 | - |
| NT5DC1  | Nt5dc1  | ENSMUSG00000039480 | - |
| OGG1    | Ogg1    | ENSMUSG00000030271 | - |
| OTOF    | Otof    | ENSMUSG00000062372 | - |
| PALB2   | Palb2   | ENSMUSG00000044702 | - |
| PAX1    | Pax1    | ENSMUSG00000037034 | - |
| PCNT    | Pcnt    | ENSMUSG00000001151 | - |
| PDSS2   | Pdss2   | ENSMUSG00000038240 | - |
| PEPD    | Pepd    | ENSMUSG00000063931 | - |
| PEX1    | Pex1    | ENSMUSG00000005907 | - |
| PEX10   | Pex10   | ENSMUSG00000029047 | - |
| PFKL    | Pfkl    | ENSMUSG00000020277 | - |
| PKHD1   | Pkhd1   | ENSMUSG00000043760 | - |
| PKP2    | Pkp2    | ENSMUSG00000041957 | - |
| PLEC    | Plec    | ENSMUSG00000022565 | - |
| PLEKHG5 | Plekhg5 | ENSMUSG00000039713 | - |
| PLXDC1  | Plxdc1  | ENSMUSG00000017417 | - |
| PMS2    | Pms2    | ENSMUSG00000079109 | - |
| PPFIA4  | Ppfia4  | ENSMUSG00000026458 | - |
| PRSS48  | Prss48  | ENSMUSG00000049013 | - |
| PRSS55  | Prss55  | ENSMUSG00000034623 | - |
| PRX     | Prx     | ENSMUSG00000053198 | - |
| PSEN2   | Psen2   | ENSMUSG00000010609 | - |
| PSTPIP1 | Pstpip1 | ENSMUSG00000032322 | - |
| PTPRT   | Ptprt   | ENSMUSG00000053141 | - |
| PYGB    | Pygb    | ENSMUSG00000033059 | - |

|           |           |                    |                                 |
|-----------|-----------|--------------------|---------------------------------|
| QARS      | -         | -                  | Can't mapped to mouse gene name |
| RDH12     | Rdh12     | ENSMUSG00000021123 | -                               |
| RP2       | Rp2       | ENSMUSG00000060090 | -                               |
| RPGRIP1L  | Rpgrip1l  | ENSMUSG00000033282 | -                               |
| SAMHD1    | Samhd1    | ENSMUSG00000027639 | -                               |
| SCN1B     | Scn1b     | ENSMUSG00000019194 | -                               |
| SCN2A     | Scn2a     | ENSMUSG00000075318 | -                               |
| SCN5A     | Scn5a     | ENSMUSG00000032511 | -                               |
| SCN9A     | Scn9a     | ENSMUSG00000075316 | -                               |
| SCYL3     | Scyl3     | ENSMUSG00000026584 | -                               |
| SEMA4A    | Sema4a    | ENSMUSG00000028064 | -                               |
| SEPTIN7   | Septin7   | ENSMUSG00000001833 | -                               |
| SGCD      | Sgcd      | ENSMUSG00000020354 | -                               |
| SKI       | Ski       | ENSMUSG00000029050 | -                               |
| SLA2      | Sla2      | ENSMUSG00000027636 | -                               |
| SLC17A5   | Slc17a5   | ENSMUSG00000049624 | -                               |
| SLC26A2   | Slc26a2   | ENSMUSG00000034320 | -                               |
| SLC34A1   | Slc34a1   | ENSMUSG00000021490 | -                               |
| SLC41A3   | Slc41a3   | ENSMUSG00000030089 | -                               |
| SLC5A10   | Slc5a10   | ENSMUSG00000042371 | -                               |
| SLC5A9    | Slc5a9    | ENSMUSG00000028544 | -                               |
| SMAD7     | Smad7     | ENSMUSG00000025880 | -                               |
| SOD3      | Sod3      | ENSMUSG00000072941 | -                               |
| SOX8      | Sox8      | ENSMUSG00000024176 | -                               |
| SPATA13   | Spata13   | ENSMUSG00000021990 | -                               |
| SPG7      | Spg7      | ENSMUSG00000000738 | -                               |
| SPTBN4    | Sptbn4    | ENSMUSG00000011751 | -                               |
| STOML3    | Stoml3    | ENSMUSG00000027744 | -                               |
| SYNE1     | Syne1     | ENSMUSG00000096054 | -                               |
| SZT2      | Szt2      | ENSMUSG00000033253 | -                               |
| TBX1      | Tbx1      | ENSMUSG00000009097 | -                               |
| TCAP      | Tcap      | ENSMUSG00000007877 | -                               |
| TFAP4     | Tfap4     | ENSMUSG00000005718 | -                               |
| TGFBI     | Tgfb1     | ENSMUSG00000035493 | -                               |
| THBD      | Thbd      | ENSMUSG00000074743 | -                               |
| TNFRSF13B | Tnfrsf13b | ENSMUSG00000010142 | -                               |
| TNIK      | Tnik      | ENSMUSG00000027692 | -                               |
| TNMD      | Tnmd      | ENSMUSG00000031250 | -                               |
| TOP3B     | Top3b     | ENSMUSG00000022779 | -                               |
| TPP1      | Tpp1      | ENSMUSG00000030894 | -                               |
| TRRAP     | Trrap     | ENSMUSG00000045482 | -                               |
| TSPAN15   | Tspan15   | ENSMUSG00000037031 | -                               |
| TTC21B    | Ttc21b    | ENSMUSG00000034848 | -                               |
| TTC7B     | Ttc7b     | ENSMUSG00000033530 | -                               |
| TTN       | Ttn       | ENSMUSG00000051747 | -                               |
| TYSND1    | Tysnd1    | ENSMUSG00000020087 | -                               |
| UMODL1    | Umodl1    | ENSMUSG00000054134 | -                               |
| UTRN      | Utrn      | ENSMUSG00000019820 | -                               |
| VPS13B    | Vps13b    | ENSMUSG00000037646 | -                               |
| VWA1      | Vwa1      | ENSMUSG00000042116 | -                               |
| WDR62     | Wdr62     | ENSMUSG00000037020 | -                               |
| XPA       | Xpa       | ENSMUSG00000028329 | -                               |
| ZFXH3     | Zfxh3     | ENSMUSG00000038872 | -                               |

**Supplementary Table S6. Knockout mouse phenotypes enriched in AIS candidate genes**

| Phenotype category                                  | No. of reference genes | No. of overlap with AIS candidate genes | <i>p</i> -value         | q-value (FDR)           |
|-----------------------------------------------------|------------------------|-----------------------------------------|-------------------------|-------------------------|
| muscle phenotype                                    | 1282                   | 48                                      | 2.36 x 10 <sup>-9</sup> | 1.54 x 10 <sup>-5</sup> |
| abnormal neuron morphology                          | 1243                   | 45                                      | 2.56 x 10 <sup>-8</sup> | 8.35 x 10 <sup>-5</sup> |
| abnormal muscle morphology                          | 928                    | 36                                      | 1.77 x 10 <sup>-7</sup> | 1.99 x 10 <sup>-4</sup> |
| decreased body weight                               | 1615                   | 51                                      | 1.96 x 10 <sup>-7</sup> | 1.99 x 10 <sup>-4</sup> |
| decreased total tissue mass                         | 1615                   | 51                                      | 1.96 x 10 <sup>-7</sup> | 1.99 x 10 <sup>-4</sup> |
| abnormal spine curvature                            | 242                    | 17                                      | 1.97 x 10 <sup>-7</sup> | 1.99 x 10 <sup>-4</sup> |
| abnormal muscle physiology                          | 770                    | 32                                      | 2.14 x 10 <sup>-7</sup> | 1.99 x 10 <sup>-4</sup> |
| premature death                                     | 952                    | 36                                      | 3.33 x 10 <sup>-7</sup> | 2.71 x 10 <sup>-4</sup> |
| abnormal total tissue mass                          | 1814                   | 54                                      | 5.15 x 10 <sup>-7</sup> | 3.59 x 10 <sup>-4</sup> |
| abnormal muscle fiber morphology                    | 322                    | 19                                      | 5.50 x 10 <sup>-7</sup> | 3.59 x 10 <sup>-4</sup> |
| abnormal skeletal muscle fiber morphology           | 169                    | 13                                      | 2.11 x 10 <sup>-6</sup> | 1.16 x 10 <sup>-3</sup> |
| abnormal muscle electrophysiology                   | 26                     | 6                                       | 2.27 x 10 <sup>-6</sup> | 1.16 x 10 <sup>-3</sup> |
| postnatal growth retardation                        | 773                    | 30                                      | 2.31 x 10 <sup>-6</sup> | 1.16 x 10 <sup>-3</sup> |
| abnormal postnatal growth                           | 798                    | 30                                      | 4.40 x 10 <sup>-6</sup> | 2.05 x 10 <sup>-3</sup> |
| abnormal body weight                                | 1945                   | 54                                      | 4.76 x 10 <sup>-6</sup> | 2.07 x 10 <sup>-3</sup> |
| myopathy                                            | 46                     | 7                                       | 6.12 x 10 <sup>-6</sup> | 2.44 x 10 <sup>-3</sup> |
| abnormal skeletal muscle morphology                 | 381                    | 19                                      | 6.67 x 10 <sup>-6</sup> | 2.44 x 10 <sup>-3</sup> |
| abnormal QRS complex                                | 65                     | 8                                       | 6.73 x 10 <sup>-6</sup> | 2.44 x 10 <sup>-3</sup> |
| kyphosis                                            | 162                    | 12                                      | 7.80 x 10 <sup>-6</sup> | 2.68 x 10 <sup>-3</sup> |
| centrally nucleated skeletal muscle fibers          | 70                     | 8                                       | 1.18 x 10 <sup>-5</sup> | 3.84 x 10 <sup>-3</sup> |
| abnormal somatic nervous system morphology          | 845                    | 30                                      | 1.37 x 10 <sup>-5</sup> | 4.25 x 10 <sup>-3</sup> |
| abnormal gait                                       | 372                    | 18                                      | 1.79 x 10 <sup>-5</sup> | 4.82 x 10 <sup>-3</sup> |
| dilated heart                                       | 176                    | 12                                      | 1.81 x 10 <sup>-5</sup> | 4.82 x 10 <sup>-3</sup> |
| short stride length                                 | 54                     | 7                                       | 1.83 x 10 <sup>-5</sup> | 4.82 x 10 <sup>-3</sup> |
| cardiac fibrosis                                    | 122                    | 10                                      | 1.90 x 10 <sup>-5</sup> | 4.82 x 10 <sup>-3</sup> |
| abnormal heart electrocardiography waveform feature | 149                    | 11                                      | 1.95 x 10 <sup>-5</sup> | 4.82 x 10 <sup>-3</sup> |
| abnormal locomotor coordination                     | 566                    | 23                                      | 1.99 x 10 <sup>-5</sup> | 4.82 x 10 <sup>-3</sup> |
| abnormal muscle contractility                       | 315                    | 16                                      | 2.99 x 10 <sup>-5</sup> | 6.96 x 10 <sup>-3</sup> |
| neurodegeneration                                   | 388                    | 18                                      | 3.13 x 10 <sup>-5</sup> | 7.04 x 10 <sup>-3</sup> |
| respiratory system phenotype                        | 1209                   | 37                                      | 3.26 x 10 <sup>-5</sup> | 7.08 x 10 <sup>-3</sup> |
| absent vertebral body                               | 5                      | 3                                       | 3.59 x 10 <sup>-5</sup> | 7.55 x 10 <sup>-3</sup> |
| heart block                                         | 61                     | 7                                       | 4.11 x 10 <sup>-5</sup> | 8.11 x 10 <sup>-3</sup> |
| abnormal stride length                              | 61                     | 7                                       | 4.11 x 10 <sup>-5</sup> | 8.11 x 10 <sup>-3</sup> |
| decreased cardiac muscle contractility              | 163                    | 11                                      | 4.49 x 10 <sup>-5</sup> | 8.61 x 10 <sup>-3</sup> |
| abnormal glial cell morphology                      | 296                    | 15                                      | 5.50 x 10 <sup>-5</sup> | 1.03 x 10 <sup>-2</sup> |
| abnormal impulse conducting system conduction       | 169                    | 11                                      | 6.24 x 10 <sup>-5</sup> | 1.13 x 10 <sup>-2</sup> |
| increased inflammatory response                     | 873                    | 29                                      | 6.63 x 10 <sup>-5</sup> | 1.16 x 10 <sup>-2</sup> |
| abnormal heart ventricle morphology                 | 612                    | 23                                      | 6.76 x 10 <sup>-5</sup> | 1.16 x 10 <sup>-2</sup> |
| skeletal muscle necrosis                            | 29                     | 5                                       | 7.43 x 10 <sup>-5</sup> | 1.21 x 10 <sup>-2</sup> |
| prolonged QRS complex duration                      | 29                     | 5                                       | 7.43 x 10 <sup>-5</sup> | 1.21 x 10 <sup>-2</sup> |
| abnormal respiratory system physiology              | 748                    | 26                                      | 8.00 x 10 <sup>-5</sup> | 1.26 x 10 <sup>-2</sup> |
| vision/eye phenotype                                | 1462                   | 41                                      | 8.36 x 10 <sup>-5</sup> | 1.26 x 10 <sup>-2</sup> |
| abnormal locomotor behavior                         | 1365                   | 39                                      | 8.79 x 10 <sup>-5</sup> | 1.26 x 10 <sup>-2</sup> |
| intraventricular block                              | 30                     | 5                                       | 8.81 x 10 <sup>-5</sup> | 1.26 x 10 <sup>-2</sup> |
| bundle branch block                                 | 30                     | 5                                       | 8.81 x 10 <sup>-5</sup> | 1.26 x 10 <sup>-2</sup> |

|                                                               |      |    |                       |                       |
|---------------------------------------------------------------|------|----|-----------------------|-----------------------|
| abnormal voluntary movement                                   | 1466 | 41 | $8.89 \times 10^{-5}$ | $1.26 \times 10^{-2}$ |
| abnormal inner ear morphology                                 | 276  | 14 | $9.73 \times 10^{-5}$ | $1.35 \times 10^{-2}$ |
| abnormal myocardial fiber morphology                          | 148  | 10 | $9.93 \times 10^{-5}$ | $1.35 \times 10^{-2}$ |
| cardiomyopathy                                                | 94   | 8  | $1.01 \times 10^{-4}$ | $1.35 \times 10^{-2}$ |
| dystrophic muscle                                             | 31   | 5  | $1.04 \times 10^{-4}$ | $1.35 \times 10^{-2}$ |
| skeletal muscle fiber necrosis                                | 17   | 4  | $1.14 \times 10^{-4}$ | $1.45 \times 10^{-2}$ |
| abnormal microglial cell morphology                           | 72   | 7  | $1.20 \times 10^{-4}$ | $1.51 \times 10^{-2}$ |
| abnormal eye morphology                                       | 1346 | 38 | $1.43 \times 10^{-4}$ | $1.76 \times 10^{-2}$ |
| abnormal somatic sensory system morphology                    | 603  | 22 | $1.52 \times 10^{-4}$ | $1.83 \times 10^{-2}$ |
| abnormal auditory brainstem response                          | 363  | 16 | $1.60 \times 10^{-4}$ | $1.90 \times 10^{-2}$ |
| postnatal lethality                                           | 1014 | 31 | $1.67 \times 10^{-4}$ | $1.95 \times 10^{-2}$ |
| abnormal cochlea morphology                                   | 222  | 12 | $1.72 \times 10^{-4}$ | $1.97 \times 10^{-2}$ |
| impaired muscle contractility                                 | 224  | 12 | $1.87 \times 10^{-4}$ | $2.04 \times 10^{-2}$ |
| abnormal retinal photoreceptor morphology                     | 160  | 10 | $1.89 \times 10^{-4}$ | $2.04 \times 10^{-2}$ |
| abnormal Cajal-Retzius cell morphology                        | 8    | 3  | $1.94 \times 10^{-4}$ | $2.04 \times 10^{-2}$ |
| abnormal A band morphology                                    | 8    | 3  | $1.94 \times 10^{-4}$ | $2.04 \times 10^{-2}$ |
| abnormal exercise endurance                                   | 55   | 6  | $1.97 \times 10^{-4}$ | $2.04 \times 10^{-2}$ |
| muscle weakness                                               | 78   | 7  | $1.99 \times 10^{-4}$ | $2.04 \times 10^{-2}$ |
| abnormal respiration                                          | 489  | 19 | $2.00 \times 10^{-4}$ | $2.04 \times 10^{-2}$ |
| decreased skeletal muscle fiber size                          | 79   | 7  | $2.16 \times 10^{-4}$ | $2.17 \times 10^{-2}$ |
| decreased skeletal muscle fiber diameter                      | 37   | 5  | $2.47 \times 10^{-4}$ | $2.44 \times 10^{-2}$ |
| dilated heart left ventricle                                  | 81   | 7  | $2.53 \times 10^{-4}$ | $2.46 \times 10^{-2}$ |
| abnormal hearing electrophysiology                            | 380  | 16 | $2.69 \times 10^{-4}$ | $2.58 \times 10^{-2}$ |
| abnormal retinal photoreceptor layer morphology               | 168  | 10 | $2.81 \times 10^{-4}$ | $2.66 \times 10^{-2}$ |
| deafness                                                      | 110  | 8  | $3.03 \times 10^{-4}$ | $2.82 \times 10^{-2}$ |
| abnormal heart morphology                                     | 1297 | 36 | $3.14 \times 10^{-4}$ | $2.82 \times 10^{-2}$ |
| abnormal skeletal muscle fiber size                           | 111  | 8  | $3.22 \times 10^{-4}$ | $2.82 \times 10^{-2}$ |
| abnormal basicranium morphology                               | 111  | 8  | $3.22 \times 10^{-4}$ | $2.82 \times 10^{-2}$ |
| increased or absent threshold for auditory brainstem response | 310  | 14 | $3.26 \times 10^{-4}$ | $2.82 \times 10^{-2}$ |
| abnormal ileum morphology                                     | 22   | 4  | $3.29 \times 10^{-4}$ | $2.82 \times 10^{-2}$ |
| prolonged PR interval                                         | 22   | 4  | $3.29 \times 10^{-4}$ | $2.82 \times 10^{-2}$ |
| abnormal membranous labyrinth morphology                      | 239  | 12 | $3.40 \times 10^{-4}$ | $2.88 \times 10^{-2}$ |
| hearing/vestibular/ear phenotype                              | 685  | 23 | $3.57 \times 10^{-4}$ | $2.97 \times 10^{-2}$ |
| abnormal inflammatory response                                | 1059 | 31 | $3.62 \times 10^{-4}$ | $2.97 \times 10^{-2}$ |
| abnormal cochlear ganglion morphology                         | 86   | 7  | $3.66 \times 10^{-4}$ | $2.97 \times 10^{-2}$ |
| abnormal ear physiology                                       | 472  | 18 | $3.72 \times 10^{-4}$ | $2.97 \times 10^{-2}$ |
| abnormal scala media morphology                               | 207  | 11 | $3.73 \times 10^{-4}$ | $2.97 \times 10^{-2}$ |
| abnormal cardiac muscle contractility                         | 208  | 11 | $3.89 \times 10^{-4}$ | $3.02 \times 10^{-2}$ |
| abnormal cochlear labyrinth morphology                        | 208  | 11 | $3.89 \times 10^{-4}$ | $3.02 \times 10^{-2}$ |
| decreased aerobic running capacity                            | 10   | 3  | $4.06 \times 10^{-4}$ | $3.09 \times 10^{-2}$ |
| abnormal cochlear hair cell morphology                        | 176  | 10 | $4.08 \times 10^{-4}$ | $3.09 \times 10^{-2}$ |
| abnormal hearing physiology                                   | 436  | 17 | $4.23 \times 10^{-4}$ | $3.17 \times 10^{-2}$ |
| abnormal cardiovascular system morphology                     | 1794 | 45 | $4.70 \times 10^{-4}$ | $3.48 \times 10^{-2}$ |
| impaired exercise endurance                                   | 43   | 5  | $5.06 \times 10^{-4}$ | $3.69 \times 10^{-2}$ |
| abnormal cochlear sensory epithelium morphology               | 181  | 10 | $5.09 \times 10^{-4}$ | $3.69 \times 10^{-2}$ |
| abnormal organ of Corti morphology                            | 182  | 10 | $5.31 \times 10^{-4}$ | $3.81 \times 10^{-2}$ |

|                                               |      |    |                       |                       |
|-----------------------------------------------|------|----|-----------------------|-----------------------|
| dilated heart ventricle                       | 120  | 8  | $5.45 \times 10^{-4}$ | $3.81 \times 10^{-2}$ |
| prolonged P wave                              | 11   | 3  | $5.53 \times 10^{-4}$ | $3.81 \times 10^{-2}$ |
| atrioventricular valve regurgitation          | 11   | 3  | $5.53 \times 10^{-4}$ | $3.81 \times 10^{-2}$ |
| abnormal hair cell morphology                 | 183  | 10 | $5.55 \times 10^{-4}$ | $3.81 \times 10^{-2}$ |
| abnormal skeletal muscle mass                 | 121  | 8  | $5.76 \times 10^{-4}$ | $3.92 \times 10^{-2}$ |
| abnormal heart layer morphology               | 368  | 15 | $5.91 \times 10^{-4}$ | $3.97 \times 10^{-2}$ |
| abnormal brain morphology                     | 1444 | 38 | $5.98 \times 10^{-4}$ | $3.98 \times 10^{-2}$ |
| thick ventricular wall                        | 45   | 5  | $6.26 \times 10^{-4}$ | $4.11 \times 10^{-2}$ |
| hindlimb paralysis                            | 68   | 6  | $6.29 \times 10^{-4}$ | $4.11 \times 10^{-2}$ |
| abnormal axon morphology                      | 157  | 9  | $7.45 \times 10^{-4}$ | $4.81 \times 10^{-2}$ |
| lethality during fetal growth through weaning | 1890 | 46 | $7.80 \times 10^{-4}$ | $4.99 \times 10^{-2}$ |

---



**Supplementary Table S7. GO terms enriched in AIS candidate genes**

| GO term                                                        | No. of reference genes | No. of overlap with AIS-genes of interest | <i>p</i> -value        | q-value (FDR)         |
|----------------------------------------------------------------|------------------------|-------------------------------------------|------------------------|-----------------------|
| actin filament-based movement                                  | 132                    | 15                                        | $7.50 \times 10^{-11}$ | $9.78 \times 10^{-8}$ |
| Sarcolemma                                                     | 134                    | 14                                        | $1.01 \times 10^{-9}$  | $6.59 \times 10^{-7}$ |
| structural constituent of muscle                               | 44                     | 9                                         | $2.52 \times 10^{-9}$  | $8.64 \times 10^{-7}$ |
| contractile fiber                                              | 226                    | 17                                        | $2.65 \times 10^{-9}$  | $8.64 \times 10^{-7}$ |
| actin binding                                                  | 419                    | 22                                        | $9.70 \times 10^{-9}$  | $2.53 \times 10^{-6}$ |
| muscle system process                                          | 423                    | 21                                        | $5.62 \times 10^{-8}$  | $1.22 \times 10^{-5}$ |
| muscle organ development                                       | 380                    | 19                                        | $2.24 \times 10^{-7}$  | $4.18 \times 10^{-5}$ |
| heart morphogenesis                                            | 250                    | 15                                        | $4.58 \times 10^{-7}$  | $7.46 \times 10^{-5}$ |
| regulation of membrane potential                               | 414                    | 19                                        | $8.26 \times 10^{-7}$  | $1.20 \times 10^{-4}$ |
| passive transmembrane transporter activity                     | 457                    | 19                                        | $3.55 \times 10^{-6}$  | $4.63 \times 10^{-4}$ |
| circulatory system process                                     | 480                    | 19                                        | $7.18 \times 10^{-6}$  | $8.51 \times 10^{-4}$ |
| multicellular organismal signaling                             | 170                    | 11                                        | $7.96 \times 10^{-6}$  | $8.65 \times 10^{-4}$ |
| sodium ion transport                                           | 213                    | 12                                        | $1.26 \times 10^{-5}$  | $1.19 \times 10^{-3}$ |
| sensory organ morphogenesis                                    | 250                    | 13                                        | $1.29 \times 10^{-5}$  | $1.19 \times 10^{-3}$ |
| muscle tissue development                                      | 371                    | 16                                        | $1.37 \times 10^{-5}$  | $1.19 \times 10^{-3}$ |
| pigmentation                                                   | 95                     | 8                                         | $2.14 \times 10^{-5}$  | $1.75 \times 10^{-3}$ |
| regulation of ion transmembrane transport                      | 441                    | 17                                        | $3.11 \times 10^{-5}$  | $2.38 \times 10^{-3}$ |
| ossification                                                   | 371                    | 15                                        | $5.39 \times 10^{-5}$  | $3.73 \times 10^{-3}$ |
| sensory perception of light stimulus                           | 209                    | 11                                        | $5.44 \times 10^{-5}$  | $3.73 \times 10^{-3}$ |
| transporter complex                                            | 332                    | 14                                        | $6.13 \times 10^{-5}$  | $4.00 \times 10^{-3}$ |
| actin cytoskeleton                                             | 482                    | 17                                        | $9.33 \times 10^{-5}$  | $5.80 \times 10^{-3}$ |
| metal ion transmembrane transporter activity                   | 440                    | 16                                        | $1.06 \times 10^{-4}$  | $5.84 \times 10^{-3}$ |
| connective tissue development                                  | 265                    | 12                                        | $1.06 \times 10^{-4}$  | $5.84 \times 10^{-3}$ |
| actinin binding                                                | 39                     | 5                                         | $1.07 \times 10^{-4}$  | $5.84 \times 10^{-3}$ |
| ion channel binding                                            | 123                    | 8                                         | $1.36 \times 10^{-4}$  | $7.08 \times 10^{-3}$ |
| extracellular matrix structural constituent                    | 158                    | 9                                         | $1.44 \times 10^{-4}$  | $7.19 \times 10^{-3}$ |
| skeletal system morphogenesis                                  | 234                    | 11                                        | $1.49 \times 10^{-4}$  | $7.19 \times 10^{-3}$ |
| odontogenesis                                                  | 126                    | 8                                         | $1.60 \times 10^{-4}$  | $7.47 \times 10^{-3}$ |
| cardiac chamber development                                    | 164                    | 9                                         | $1.91 \times 10^{-4}$  | $8.57 \times 10^{-3}$ |
| apical part of cell                                            | 375                    | 14                                        | $2.20 \times 10^{-4}$  | $9.57 \times 10^{-3}$ |
| pattern specification process                                  | 433                    | 15                                        | $2.94 \times 10^{-4}$  | $1.23 \times 10^{-2}$ |
| gland development                                              | 434                    | 15                                        | $3.02 \times 10^{-4}$  | $1.23 \times 10^{-2}$ |
| inorganic anion transport                                      | 177                    | 9                                         | $3.36 \times 10^{-4}$  | $1.33 \times 10^{-2}$ |
| cell-cell junction                                             | 441                    | 15                                        | $3.57 \times 10^{-4}$  | $1.37 \times 10^{-2}$ |
| SMAD binding                                                   | 80                     | 6                                         | $4.43 \times 10^{-4}$  | $1.57 \times 10^{-2}$ |
| sensory system development                                     | 355                    | 13                                        | $4.44 \times 10^{-4}$  | $1.57 \times 10^{-2}$ |
| actomyosin structure organization                              | 184                    | 9                                         | $4.47 \times 10^{-4}$  | $1.57 \times 10^{-2}$ |
| regulation of actin filament-based process                     | 362                    | 13                                        | $5.33 \times 10^{-4}$  | $1.83 \times 10^{-2}$ |
| collagen trimer                                                | 87                     | 6                                         | $6.93 \times 10^{-4}$  | $2.32 \times 10^{-2}$ |
| actin-based cell projection                                    | 197                    | 9                                         | $7.30 \times 10^{-4}$  | $2.38 \times 10^{-2}$ |
| cell junction organization                                     | 285                    | 11                                        | $7.93 \times 10^{-4}$  | $2.52 \times 10^{-2}$ |
| monovalent inorganic cation transmembrane transporter activity | 382                    | 13                                        | $8.77 \times 10^{-4}$  | $2.72 \times 10^{-2}$ |
| sensory perception of mechanical stimulus                      | 163                    | 8                                         | $9.04 \times 10^{-4}$  | $2.74 \times 10^{-2}$ |

|                                                       |     |    |                       |                       |
|-------------------------------------------------------|-----|----|-----------------------|-----------------------|
| somite development                                    | 92  | 6  | $9.30 \times 10^{-4}$ | $2.76 \times 10^{-2}$ |
| muscle cell differentiation                           | 338 | 12 | $9.60 \times 10^{-4}$ | $2.78 \times 10^{-2}$ |
| ATPase activity                                       | 438 | 14 | $1.03 \times 10^{-3}$ | $2.85 \times 10^{-2}$ |
| response to mechanical stimulus                       | 207 | 9  | $1.04 \times 10^{-3}$ | $2.85 \times 10^{-2}$ |
| detection of external stimulus                        | 129 | 7  | $1.05 \times 10^{-3}$ | $2.85 \times 10^{-2}$ |
| bone development                                      | 208 | 9  | $1.07 \times 10^{-3}$ | $2.85 \times 10^{-2}$ |
| vacuolar lumen                                        | 170 | 8  | $1.19 \times 10^{-3}$ | $3.08 \times 10^{-2}$ |
| detection of abiotic stimulus                         | 132 | 7  | $1.21 \times 10^{-3}$ | $3.08 \times 10^{-2}$ |
| positive regulation of ion transport                  | 258 | 10 | $1.32 \times 10^{-3}$ | $3.27 \times 10^{-2}$ |
| extracellular structure organization                  | 400 | 13 | $1.33 \times 10^{-3}$ | $3.27 \times 10^{-2}$ |
| cardiocyte differentiation                            | 141 | 7  | $1.76 \times 10^{-3}$ | $4.12 \times 10^{-2}$ |
| tongue development                                    | 20  | 3  | $1.77 \times 10^{-3}$ | $4.12 \times 10^{-2}$ |
| ankyrin binding                                       | 20  | 3  | $1.77 \times 10^{-3}$ | $4.12 \times 10^{-2}$ |
| cluster of actin-based cell projections               | 143 | 7  | $1.91 \times 10^{-3}$ | $4.35 \times 10^{-2}$ |
| cellular component assembly involved in morphogenesis | 106 | 6  | $1.93 \times 10^{-3}$ | $4.35 \times 10^{-2}$ |
| neuromuscular process                                 | 107 | 6  | $2.03 \times 10^{-3}$ | $4.48 \times 10^{-2}$ |
| embryonic organ development                           | 423 | 13 | $2.18 \times 10^{-3}$ | $4.74 \times 10^{-2}$ |

---

**Supplementary Table S8. Pathogenic rare variants on TTN and CLCN1.**

[illegible]

1. Wang H, Wu Z, Zhuang Q, Fei Q, Zhang J, Liu Y, Wang Y, Ding Y, and Qiu G, *Association study of tryptophan hydroxylase 1 and arylalkylamine N-acetyltransferase polymorphisms with adolescent idiopathic scoliosis in Han Chinese*. Spine (Phila Pa 1976), 2008. **33**(20): p. 2199-203.
2. Khanshour AM, Kou I, Fan Y, Einarisdottir E, Makki N, et al., *Genome-wide meta-analysis and replication studies in multiple ethnicities identify novel adolescent idiopathic scoliosis susceptibility loci*. Hum Mol Genet, 2018. **27**(22): p. 3986-3998.
3. Kou I, Otomo N, Takeda K, Momozawa Y, Lu HF, et al., *Genome-wide association study identifies 14 previously unreported susceptibility loci for adolescent idiopathic scoliosis in Japanese*. Nat Commun, 2019. **10**(1): p. 3685.
4. Zhu Z, Tang NL, Xu L, Qin X, Mao S, et al., *Genome-wide association study identifies new susceptibility loci for adolescent idiopathic scoliosis in Chinese girls*. Nat Commun, 2015. **6**: p. 8355.
5. Li W, Li Y, Zhang L, Guo H, Tian D, et al., *AKAP2 identified as a novel gene mutated in a Chinese family with adolescent idiopathic scoliosis*. J Med Genet, 2016. **53**(7): p. 488-93.
6. Xu L, Xia C, Qin X, Sun W, Tang NL, Qiu Y, Cheng JC, and Zhu Z, *Genetic variant of BNC2 gene is functionally associated with adolescent idiopathic scoliosis in Chinese population*. Mol Genet Genomics, 2017. **292**(4): p. 789-794.
7. Zhao D, Qiu GX, Wang YP, Zhang JG, Shen JX, and Wu ZH, *Association between adolescent idiopathic scoliosis with double curve and polymorphisms of calmodulin I gene/estrogen receptor- $\alpha$  gene*. Orthop Surg, 2009. **1**(3): p. 222-30.
8. Borysiak K, Janusz P, Andrusiewicz M, Chmielewska M, Kozinoga M, Kotwicki T, and Kotwicka M, *CHD7 gene polymorphisms in female patients with idiopathic scoliosis*. BMC Musculoskelet Disord, 2020. **21**(1): p. 18.
9. Sharma S, Gao X, Londono D, Devroy SE, Mauldin KN, et al., *Genome-wide association studies of adolescent idiopathic scoliosis suggest candidate susceptibility genes*. Hum Mol Genet, 2011. **20**(7): p. 1456-66.
10. Qiu XS, Tang NL, Yeung HY, Qiu Y, and Cheng JC, *Association study between adolescent idiopathic scoliosis and the DPP9 gene which is located in the candidate region identified by linkage analysis*. Postgrad Med J, 2008. **84**(995): p. 498-501.
11. Chen S, Zhao L, Roffey DM, Phan P, and Wai EK, *Association between the ESR1 -351A>G single nucleotide polymorphism (rs9340799) and adolescent idiopathic scoliosis: a systematic review and meta-analysis*. Eur Spine J, 2014. **23**(12): p. 2586-93.
12. Buchan JG, Alvarado DM, Haller GE, Cruchaga C, Harms MB, et al., *Rare variants in FBN1 and FBN2 are associated with severe adolescent idiopathic scoliosis*. Hum Mol Genet, 2014. **23**(19): p. 5271-82.
13. Sheng F, Xia C, Xu L, Qin X, Tang NL, Qiu Y, Cheng JC, and Zhu Z, *New Evidence Supporting the Role of FBN1 in the Development of Adolescent Idiopathic Scoliosis*. Spine (Phila Pa 1976), 2019. **44**(4): p. E225-e232.
14. Kou I, Takahashi Y, Johnson TA, Takahashi A, Guo L, et al., *Genetic variants in GPR126 are associated with adolescent idiopathic scoliosis*. Nat Genet, 2013. **45**(6): p. 676-9.
15. Guan M, Wang H, Fang H, Zhang C, Gao S, and Zou Y, *Association between IGF1 gene single nucleotide polymorphism (rs5742612) and adolescent idiopathic scoliosis: a meta-analysis*. Eur Spine J, 2017. **26**(6): p. 1624-1630.
16. Zhou S, Zhu Z, Qiu X, Wu W, Wang W, Liu Z, Lv F, and Qiu Y, *Association study of IL-17RC, CHL1, DSCAM and CNTNAP2 genes polymorphisms with adolescent*

- idiopathic scoliosis susceptibility in a Chinese Han population*. Stud Health Technol Inform, 2012. **176**: p. 47-51.
17. Zhou S, Qiu XS, Zhu ZZ, Wu WF, Liu Z, and Qiu Y, *A single-nucleotide polymorphism rs708567 in the IL-17RC gene is associated with a susceptibility to and the curve severity of adolescent idiopathic scoliosis in a Chinese Han population: a case-control study*. BMC Musculoskelet Disord, 2012. **13**: p. 181.
  18. Gao J, Zhang L, Liu Z, Yao S, and Gao S, *[Correlation analysis between interleukin 6 polymorphism and adolescent idiopathic scoliosis susceptibility and bracing effectiveness]*. Zhongguo Xiu Fu Chong Jian Wai Ke Za Zhi, 2018. **32**(6): p. 678-684.
  19. Liu S, Wu N, Zuo Y, Zhou Y, Liu J, et al., *Genetic Polymorphism of LBX1 Is Associated With Adolescent Idiopathic Scoliosis in Northern Chinese Han Population*. Spine (Phila Pa 1976), 2017. **42**(15): p. 1125-1129.
  20. Cao Y, Min J, Zhang Q, Li H, and Li H, *Associations of LBX1 gene and adolescent idiopathic scoliosis susceptibility: a meta-analysis based on 34,626 subjects*. BMC Musculoskelet Disord, 2016. **17**: p. 309.
  21. Liu Z, Wang F, Xu LL, Sha SF, Zhang W, et al., *Polymorphism of rs2767485 in Leptin Receptor Gene is Associated With the Occurrence of Adolescent Idiopathic Scoliosis*. Spine (Phila Pa 1976), 2015. **40**(20): p. 1593-8.
  22. Zhu Z, Xu L, Leung-Sang Tang N, Qin X, Feng Z, et al., *Genome-wide association study identifies novel susceptible loci and highlights Wnt/beta-catenin pathway in the development of adolescent idiopathic scoliosis*. Hum Mol Genet, 2017. **26**(8): p. 1577-1583.
  23. Zhou T, Chen C, Xu C, Zhou H, Gao B, et al., *Mutant MAPK7-Induced Idiopathic Scoliosis is Linked to Impaired Osteogenesis*. Cell Physiol Biochem, 2018. **48**(3): p. 880-890.
  24. Gao W, Chen C, Zhou T, Yang S, Gao B, et al., *Rare coding variants in MAPK7 predispose to adolescent idiopathic scoliosis*. Hum Mutat, 2017. **38**(11): p. 1500-1510.
  25. Zhang H, Zhao S, Zhao Z, Tang L, Guo Q, Liu S, and Chen L, *The association of rs1149048 polymorphism in matrilin-1(MATN1) gene with adolescent idiopathic scoliosis susceptibility: a meta-analysis*. Mol Biol Rep, 2014. **41**(4): p. 2543-9.
  26. Bae JW, Cho CH, Min WK, and Kim UK, *Associations between matrilin-1 gene polymorphisms and adolescent idiopathic scoliosis curve patterns in a Korean population*. Mol Biol Rep, 2012. **39**(5): p. 5561-7.
  27. Zhao J, Yang M, and Li M, *Association of IL-6 and MMP-3 gene polymorphisms with susceptibility to adolescent idiopathic scoliosis: a meta-analysis*. J Genet, 2016. **95**(3): p. 573-9.
  28. Yang P, Liu H, Lin J, and Yang H, *The Association of rs4753426 Polymorphism in the Melatonin Receptor 1B (MTNR1B) Gene and Susceptibility to Adolescent Idiopathic Scoliosis: A Systematic Review and Meta-analysis*. Pain Physician, 2015. **18**(5): p. 419-31.
  29. Xu L, Xia C, Sun W, Qin X, Qiu Y, and Zhu Z, *Genetic Polymorphism of NUCKS1 Is Associated With the Susceptibility of Adolescent Idiopathic Scoliosis*. Spine (Phila Pa 1976), 2017. **42**(21): p. 1629-1634.
  30. Xu L, Sheng F, Xia C, Qin X, Tang NL, Qiu Y, Cheng JC, and Zhu Z, *Genetic Variant of PAX1 Gene Is Functionally Associated With Adolescent Idiopathic Scoliosis in the Chinese Population*. Spine (Phila Pa 1976), 2018. **43**(7): p. 492-496.
  31. Sharma S, Londono D, Eckalbar WL, Gao X, Zhang D, et al., *A PAX1 enhancer locus is associated with susceptibility to idiopathic scoliosis in females*. Nat Commun, 2015. **6**: p. 6452.

32. Qin X, He Z, Yin R, Qiu Y, and Zhu Z, *Abnormal paravertebral muscles development is associated with abnormal expression of PAX3 in adolescent idiopathic scoliosis*. Eur Spine J, 2020. **29**(4): p. 737-743.
33. Xu L, Sheng F, Xia C, Li Y, Feng Z, Qiu Y, and Zhu Z, *Common Variant of POC5 Is Associated With the Susceptibility of Adolescent Idiopathic Scoliosis*. Spine (Phila Pa 1976), 2018. **43**(12): p. E683-e688.
34. Patten SA, Margaritte-Jeannin P, Bernard JC, Alix E, Labalme A, et al., *Functional variants of POC5 identified in patients with idiopathic scoliosis*. J Clin Invest, 2015. **125**(3): p. 1124-8.
35. Wang WJ, Sun C, Liu Z, Sun X, Zhu F, Zhu ZZ, and Qiu Y, *Transcription factor Runx2 in the low bone mineral density of girls with adolescent idiopathic scoliosis*. Orthop Surg, 2014. **6**(1): p. 8-14.
36. Yang T, Xu JZ, Jia QZ, Guo H, Luo F, Ye Q, and Bai Y, *[Comparative analysis of sequence alignment of SH3GL1 gene as a disease candidate gene of adolescent idiopathic scoliosis]*. Zhonghua Wai Ke Za Zhi, 2010. **48**(6): p. 435-8.
37. Yang T, Jia Q, Guo H, Xu J, Bai Y, Yang K, Luo F, Zhang Z, and Hou T, *Epidemiological survey of idiopathic scoliosis and sequence alignment analysis of multiple candidate genes*. Int Orthop, 2012. **36**(6): p. 1307-14.
38. Haller G, McCall K, Jenkitkasemwong S, Sadler B, Antunes L, et al., *A missense variant in SLC39A8 is associated with severe idiopathic scoliosis*. Nat Commun, 2018. **9**(1): p. 4171.
39. Qiao J, Xiao L, Xu L, Qian B, Zhu Z, and Qiu Y, *Genetic Variant of SOCS3 Gene is Functionally Associated With Lumbar Adolescent Idiopathic Scoliosis*. Clin Spine Surg, 2018. **31**(3): p. E193-e196.
40. Ryzhkov, II, Borzilov EE, Churnosov MI, Ataman AV, Dedkov AA, and Polonikov AV, *Transforming growth factor beta 1 is a novel susceptibility gene for adolescent idiopathic scoliosis*. Spine (Phila Pa 1976), 2013. **38**(12): p. E699-704.
41. Andrusiewicz M, Harasymczuk P, Janusz P, Biecek P, Żbikowska A, Kotwicka M, and Kotwicki T, *TIMP2 Polymorphisms Association With Curve Initiation and Progression of Thoracic Idiopathic Scoliosis in the Caucasian Females*. J Orthop Res, 2019. **37**(10): p. 2217-2225.
42. Jiang J, Qian B, Mao S, Zhao Q, Qiu X, Liu Z, and Qiu Y, *A promoter polymorphism of tissue inhibitor of metalloproteinase-2 gene is associated with severity of thoracic adolescent idiopathic scoliosis*. Spine (Phila Pa 1976), 2012. **37**(1): p. 41-7.
43. Wang Y, Cui ZQ, Luo TB, and Liu L, *Correlations of VDR and VDBP genetic polymorphisms with susceptibility to adolescent idiopathic scoliosis and efficacy of brace treatment*. Genomics, 2016. **108**(5-6): p. 194-200.
44. Yin X, Wang H, Guo J, Zhang L, Zhang Y, Li L, and Hou S, *Association of vitamin D receptor BsmI rs1544410 and ApaI rs7975232 polymorphisms with susceptibility to adolescent idiopathic scoliosis: A systematic review and meta-analysis*. Medicine (Baltimore), 2018. **97**(2): p. e9627.
45. Suh KT, Eun IS, and Lee JS, *Polymorphism in vitamin D receptor is associated with bone mineral density in patients with adolescent idiopathic scoliosis*. Eur Spine J, 2010. **19**(9): p. 1545-50.
